# Supplementary material for: Effects of vegetation structure on biomass accumulation in a Balanced Optimality Structure Vegetation Model (BOSVM v1.0)
Source: Copernicus journal article supplement (doi:10.5194/gmd-7-821-2014), 2014-05-12
Supplement: Supplementary file 1 [file gmd-7-821-2014-supplement.zip]

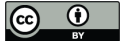

## *Supplement of*

# **Effects of vegetation structure on biomass accumulation in a Balanced Optimality Structure Vegetation Model (BOSVM v1.0)**

**Z. Yin et al.**

*Correspondence to:* Z. Yin (z.yin@uu.nl)

- Supplement-Cover-Letter.pdf
- BOSVM
  - BOSVM.f90
  - con.f90
